# Supplementary material for: Brain Activity during Lower-Limb Movement with Manual Facilitation: An fMRI Study
Source: Hindawi journal article supplement (doi:10.1155/2015/701452), 2015-01-01
Supplement: f1 [file 701452.f1.pdf]

## Appendix 1 - Brain areas of activation and Talairach coordinates

| Right Stimulation - Control Group |                                                                             |                             |                |
|-----------------------------------|-----------------------------------------------------------------------------|-----------------------------|----------------|
| Contrasts                         | B.A                                                                         | Peak Voxel                  | t*             |
| Verbal vs Baseline                | <b>BA1, BA2, BA3 - Somatosensorial Homunculus</b> (right, left)             | 2, -35, 57<br>-4, -41, 57   | 4,576<br>5,018 |
|                                   | <b>BA4 - Primary motor cortex</b> (right, left)                             | 1, -35, 60<br>-1, -35, 60   | 4,400<br>4,506 |
|                                   | <b>BA6 - Premotor cortex</b> (left)                                         | -4, -5, 51                  | 4,761          |
|                                   | <b>BA7 and BA5 - Secondary Somatosensorial Cortex</b> (right, left)         | 2, -47, 48<br>-28, -65, 55  | 5,077<br>5,604 |
|                                   | <b>BA18 - Extraestriate cortex V2</b> (right, left)                         | 2, -61, 3<br>-4, -59, 4     | 4,995<br>4,580 |
|                                   | <b>BA21 - Lateral temporal lobe</b> (right, left)                           | 59, -19, 0<br>-61, -32, 3   | 3,494<br>4,737 |
|                                   | <b>BA22- Posterior parte contains Wernicke's area</b> (right, left)         | 59, -5, 3<br>-61, -14, 6    | 5,347<br>4,801 |
|                                   | <b>BA24 - Cingulate cortex (ventral)</b> (right, left)                      | 1, -38, 51<br>-2, -38, 51   | 3,597<br>4,238 |
|                                   | <b>BA30- Retroesplenial Agranular córtex/ Cingulate gyrus</b> (right, left) | 5, -47, 3<br>-4, -53, 6     | 4,600<br>4,169 |
|                                   | <b>BA31 - Isthmus of Cingulate gyrus</b> (right, left)                      | 2, -59, 36<br>-1, -47, 48   | 3,729<br>4,552 |
|                                   | <b>BA38 - Temporal Pole</b> (left)                                          | -61, 4, 0                   | 4,868          |
|                                   | <b>BA42 - A1</b> (right, left)                                              | 59, -15, 12<br>-58, -32, 12 | 4,605<br>4,748 |
|                                   | <b>Lingual Gyrus (right, left)</b>                                          | 2, -61, 3                   | 4,995          |

|                                                        |                                                                     |              |       |
|--------------------------------------------------------|---------------------------------------------------------------------|--------------|-------|
|                                                        |                                                                     | -4, -59, 3   | 5,231 |
| Manual vs Baseline                                     | <b>BA1, BA2, BA3 - Somatosensorial Homunculus (left)</b>            | -4, -41, 57  | 4,990 |
|                                                        | <b>BA4 - Primary motor cortex (left)</b>                            | -15, -29, 63 | 3,783 |
|                                                        | <b>BA5 and BA7- Secondary somatosensorial cortex (left)</b>         | -10, -71, 48 | 4,477 |
| Verbal+Manual vs Baseline                              | <b>BA1+3 - Somatosensorial Homunculus (left)</b>                    | -4, -41, 57  | 5,003 |
|                                                        | <b>BA4 - Primary motor cortex (left)</b>                            | -1, -23, 63  | 3,497 |
|                                                        | <b>BA5 - Secondary Somatosensorial Cortex (left)</b>                | -4, -41, 57  | 5,003 |
|                                                        | <b>BA21 - Lateral temporal lobe (right, left)</b>                   | 59, -19, 0   | 4,425 |
|                                                        |                                                                     | -61, -29, 3  | 4,271 |
|                                                        | <b>BA22- Posterior parte contains Wernicke's area (right, left)</b> | 59, -17, 0   | 5,502 |
|                                                        |                                                                     | -63, -32, 6  | 5,407 |
|                                                        | <b>BA24 - Cingulate cortex (Ventral) (left)</b>                     | -4, -41, 55  | 3,388 |
|                                                        | <b>BA41 and BA42 - A1 (right, left)</b>                             | 62, -17, 6   | 4,831 |
|                                                        |                                                                     | -58, -32, 12 | 5,015 |
| Verbal vs Manual                                       | <b>BA1 - Somatosensorial Homunculus (left)</b>                      | -38, -23, 45 | 3,364 |
|                                                        | <b>BA7 and BA5 - Secondary Somatosensorial Cortex (left)</b>        | -1, -51, 45  | 4,701 |
|                                                        | <b>BA18 and BA 19 - Extraestriate cortex V2 (left)</b>              | -4, -58, 3   | 4,229 |
|                                                        | <b>BA21 - Lateral temporal lobe (right, left)</b>                   | 64, -23, 6   | 5,261 |
|                                                        |                                                                     | -61, -32, 3  | 4,749 |
|                                                        | <b>BA22- Posterior parte contains Wernicke's area (right, left)</b> | 47, -14, 6   | 6,297 |
|                                                        |                                                                     | -61, -14, 6  | 6,116 |
|                                                        | <b>BA24 - Cingulate cortex (ventral) (left)</b>                     | -1, -36, 50  | 3,454 |
|                                                        | <b>BA30- Retroesplenial Agranular cortex (right, left)</b>          | 5, -47, 3    | 4,385 |
|                                                        |                                                                     | -4, -50, 9   | 3,908 |
| <b>BA31 - Isthmus of Cingulate gyrus (right, left)</b> | 14, -62, 15                                                         | 4,178        |       |
|                                                        | -4, -50, 39                                                         | 4,814        |       |
| <b>BA38 - Temporal Pole (left)</b>                     | -61, 4, 0                                                           | 5,824        |       |
| <b>BA41 and BA42 - A1 (right), BA 42 - A1 (left)</b>   | 59, -15, 12                                                         | 4,524        |       |
|                                                        | -58, -32, 12                                                        | 4,218        |       |

|                              |                                                                      |                             |                 |
|------------------------------|----------------------------------------------------------------------|-----------------------------|-----------------|
|                              | <i>Lingual Gyrus (right, left)</i>                                   | 5, -62, -3<br>-4, -59, 3    | 4,600<br>4,997  |
| Manual vs<br>Verbal          | <b>BA18 + BA19 - Extraestriate cortex V2 (right, left)</b>           | 44, -56, -3<br>-46, -59, 6  | 4,230<br>5,044  |
|                              | <i>Orbital surface (right, left)</i>                                 | 17, 31, -3<br>-1, 28, -3    | 4,274<br>3,203  |
| Verbal vs<br>Manual + Verbal | <b>BA3 - Somatosensorial Homunculus (right), BA1, 2 and 3 (left)</b> | 1, -36, 60<br>-4, -44, 57   | 5,640<br>3,767  |
|                              | <b>BA7 and BA5 - Secondary Somatosensorial Cortex (right, left)</b>  | 20, -65, 53<br>-34, -59, 48 | 4,666<br>5,267  |
|                              | <b>BA18 and BA 19 - Extraestriate cortex V2 (right, left)</b>        | 14, -56, 18<br>-25, -80, 30 | 4,180<br>3,538  |
|                              | <b>BA24 - Cingulate cortex (ventral) (right, left)</b>               | 1, -35, 51<br>-1, -37, 50   | 2,517<br>2,905  |
|                              | <b>BA30- Retroesplenial Agranular cortex (right, left)</b>           | 14, -53, 9<br>-4, -53, 6    | 4,441<br>4,441  |
|                              | <b>BA31 - Isthmus of Cingulate gyrus (right, left)</b>               | 2, -44, 39<br>-4, -53, 35   | 4,045<br>3,990  |
| Manual + Verbal vs<br>Verbal |                                                                      |                             |                 |
| Manual vs<br>Manual + Verbal |                                                                      |                             |                 |
| Manual + Verbal vs<br>Manual | <b>BA7 and BA5 - Secondary Somatosensorial Cortex (right, left)</b>  | 2, -59, 36<br>-1, -50, 45   | 4,139<br>3, 529 |
|                              | <b>BA22 - Wernicke - (right, left)</b>                               | 59, -17, 0<br>-61, -23, 9   | 5,291<br>4,385  |
|                              | <b>BA41 and BA42 - A1 (right), BA42 (right)</b>                      | 62, -17, 6<br>-58, -32, 12  | 4,599<br>4,436  |

| Left Stimulation - Control Group |                                                                                 |                             |                |
|----------------------------------|---------------------------------------------------------------------------------|-----------------------------|----------------|
| Contrasts                        | B.A                                                                             | Peak Voxel                  | t*             |
| Verbal vs Baseline               | <b>BA1, BA2, BA3 - Somatosensorial Homunculus</b> (right, left)                 | 2, -44, 57<br>-1, -50, 57   | 4,135<br>4,196 |
|                                  | <b>BA4 - Primary motor cortex</b> (right, left)                                 | 1, -33, 60<br>-1, -32, 60   | 4,480<br>5,026 |
|                                  | <b>BA5 - Secondary somatosensorial cortex</b> (right, left)                     | 20, -35, 60<br>-3, -53, 57  | 4,052<br>3,630 |
|                                  | <b>BA6 - Premotor cortex</b> (left)                                             | -4, 4, 42                   | 5,513          |
|                                  | <b>BA21 - Lateral temporal lobe</b> (right, left)                               | 50, -23, 6<br>-49, -23, 9   | 5,310<br>5,252 |
|                                  | <b>BA22- Posterior parte contains Wernicke's area</b> (right, left)             | 50, -3, 3<br>-59, -8, 6     | 3,722<br>3,691 |
|                                  | <b>BA24 - Cingulate cortex (Ventral part)</b> (right, left)                     | 5, -38, 48<br>-4, -33, 48   | 3,663<br>4,498 |
|                                  | <b>BA38 - Temporal Pole</b> (left)                                              | -58, 7, 0                   | 4,600          |
| Manual vs Baseline               | <b>BA41 and BA42 - A1</b> (right, left)                                         | 47, -18, 7<br>-55, -18, 9   | 3,879<br>4,525 |
|                                  | <b>BA1, BA2, BA3 - Somatosensorial Homunculus</b> (right, left)                 | 11, -41, 60<br>-7, -38, 51  | 4,408<br>3,837 |
|                                  | <b>BA4 - Primary motor cortex</b> (right, left)                                 | 8, -37, 66<br>-1, -32, 57   | 4,759<br>3,781 |
|                                  | <b>BA5 and BA7- Secondary somatosensorial cortex</b> (right)/ <b>BA5</b> (left) | 38, -41, 51<br>-16, -51, 57 | 5,300<br>3,910 |
|                                  | <b>BA24 - Cingulate Cortex</b> (ventral) (right, left)                          | 5, -38, 48                  | 4,119          |

|                              |                                                                                  |              |       |
|------------------------------|----------------------------------------------------------------------------------|--------------|-------|
|                              |                                                                                  | -4, -33, 48  | 3,508 |
|                              | <b>BA32 - Anterior Cingulate</b> (right, left)                                   | 5, -17, 45   | 3,781 |
|                              |                                                                                  | -1, -17, 51  | 3,070 |
| Verbal+Manual vs<br>Baseline | <b>BA1, BA2 and BA3 - Somatosensorial Homunculus</b> (right) / <b>BA3</b> (left) | 11, -41, 60  | 4,274 |
|                              |                                                                                  | -4, -35, 50  | 4,115 |
|                              | <b>BA4 - Primary motor cortex</b> (right, left)                                  | 8, -37, 66   | 3,633 |
|                              |                                                                                  | -1, -32, 60  | 4,139 |
|                              | <b>BA5 - Secondary Somatosensorial Cortex</b> (right, left)                      | 20, -35, 57  | 4,608 |
|                              |                                                                                  | -2, -50, 54  | 2,694 |
|                              | <b>BA21 - Lateral temporal lobe</b> (right, left)                                | 62, -23, 0   | 4,321 |
|                              |                                                                                  | -47, -26, 6  | 3,043 |
|                              | <b>BA22- Posterior parte contains Wernicke's area</b> (right, left)              | 50, -5, 4    | 5,171 |
|                              |                                                                                  | -58, -7, 6   | 4,324 |
|                              | <b>BA24 - Cingulate Cortex</b> (ventral) (right, left)                           | 5, -38, 48   | 4,394 |
|                              |                                                                                  | -4, -35, 49  | 4,328 |
|                              | <b>BA38 - Temporal Pole</b> (left)                                               | -58, 7, 0    | 4,327 |
|                              | <b>BA41 and BA42 - AI</b> (right, left)                                          | 47, -18, 7   | 4,975 |
|                              |                                                                                  | -55, -18, 9  | 4,388 |
| Verbal vs Manual             | <b>BA21 - Lateral temporal lobe</b> (left)                                       | -64, -20, -6 | 5,354 |
|                              | <b>BA22- Posterior parte contains Wernicke's area</b> (right, left)              | 50, -5, 6    | 3,863 |
|                              |                                                                                  | -63, -11, 6  | 3,832 |
|                              | <b>BA38 - Temporal Pole</b> (left)                                               | -58, 7, 0    | 3,716 |
|                              | <b>BA42 - AI</b> (right, left)                                                   | 50, -15, 9   | 3,582 |
|                              |                                                                                  | -55, -17, 9  | 5,067 |
| Manual vs Verbal             | <b>BA1, BA2, BA3 - SI</b> (right, left)                                          | 9, -35, 72   | 4,655 |
|                              |                                                                                  | -16, -35, 51 | 3,875 |
|                              | <b>BA4 - MI</b> (right, left)                                                    | 26, -13, 63  | 3,927 |

|  |                                                                |               |        |
|--|----------------------------------------------------------------|---------------|--------|
|  |                                                                | -40, -11, 33  | 3,083  |
|  | <b>BA6 – Premotor</b> (right, left)                            | 38, -2, 42    | 5,112  |
|  |                                                                | -40, -2, 42   | 3,192  |
|  | <b>BA5 and BA7 - S2</b> (right, left)                          | 48, -35, 51   | 5,441  |
|  |                                                                | 16, -35, 51   | 3,878  |
|  | <b>BA10 - Prefrontal Cortex</b> (right)                        | 11, 38, 15    | 3,918  |
|  | <b>BA17 - V1</b> (right)                                       | 17, -47, 6    | 3,221  |
|  | <b>BA18 and BA19 - V2</b> (right)                              | 29, -89, -6   | 4,144  |
|  | <b>BA21 - Lateral Temporal Lobe</b> (left)                     | -52, -17, -12 | 3,732  |
|  | <b>BA23 - Cingulate Cortex - Posterior</b> (right, left)       | 2, -38, 24    | 3, 457 |
|  |                                                                | -7, -44, 30   | 3,716  |
|  | <b>BA24 - Cingulate Cortex - Ventral</b> (right, left)         | 11, -22, 36   | 4,031  |
|  |                                                                | -13, -32, 42  | 2,873  |
|  | <b>BA30 - Retroesplenial Agranular Cortex</b> (right, left)    | 2, -38, 20    | 2,755  |
|  |                                                                | -4, -41, 15   | 3,947  |
|  | <b>BA31- Isthmus - Cingulate cortex</b> (right, left)          | 5, -53, 15    | 3,227  |
|  |                                                                | -4, -35, 36   | 3,755  |
|  | <b>BA32 - Anterior Cingulate</b> (right)                       | 8, -17, 44    | 3,141  |
|  | <b>BA37- Fusiform gyrus - caudal</b> (right)                   | 38, -47, -6   | 4,398  |
|  | <b>BA39 - Angular gyrus</b> (right)                            | 53, -41, 18   | 4,106  |
|  | <b>BA40 - Secondary Somatosensorial representation</b> (right) | 53, -35, 33   | 4,187  |
|  | <b>BA44 - Broca</b> (right, left)                              | 38, 13, 30    | 3,840  |
|  |                                                                | -37, 13, 21   | 4,177  |
|  | <b>BA46 - Dorsolateral Prefrontal Cortex -</b> (right)         | 35, 31, 15    | 4,291  |
|  | <i>Anterior Lobe Cerebellum</i> (right, left)                  | 17, -41, -30  | 3,414  |
|  |                                                                | -19, -38, -27 | 5,131  |
|  | <i>Posterior Lobe Cerebellum</i> (right)                       | 14, -53, -33  | 5,260  |
|  |                                                                | -14, -53, -33 |        |

|                              |                                                                     |              |       |
|------------------------------|---------------------------------------------------------------------|--------------|-------|
|                              |                                                                     | (esq.)       |       |
|                              | <i>Amygdala</i> (right)                                             | 26, -2, -15  | 4,069 |
|                              | <i>Thalamus</i> (right, left)                                       | 23, -29, 6   | 4,864 |
|                              |                                                                     | -7, -14, 9   | 4,905 |
|                              | <i>Brainstem-Pons</i> (left)                                        | -1, -29, -24 | 4,776 |
| Verbal vs<br>Manual + Verbal |                                                                     |              |       |
| Manual + Verbal vs<br>Verbal | <b>BA4</b> - <i>MI</i> (right)                                      | 26, -11, 48  | 3,386 |
|                              | <b>BA6</b> - <i>Premotor cortex</i> (right)                         | 38, -2, 36   | 4,410 |
|                              | <b>BA7</b> - <i>S2</i> (right)                                      | 44, -41, 36  | 3,330 |
|                              | <b>BA10</b> - <i>Prefrontal cortex</i> (right)                      | 5, 49, 27    | 3,651 |
|                              | <b>BA18</b> and <b>BA19</b> - <i>V2</i> (right)                     | 35, -62, 0   | 3,882 |
|                              | <b>BA21</b> - <i>Lateral Temporal Lobe</i> (right)                  | 41, -20, -3  | 3,597 |
|                              | <b>BA22</b> - <i>Wernicke</i> (right)                               | 47, -11, -9  | 3,718 |
|                              | <b>BA32</b> - <i>Anterior Cingulate</i> (right)                     | 11, 37, 15   | 2,996 |
|                              | <b>BA37</b> - <i>Fusiform Gyrus</i> (right)                         | 45, -40, 12  | 2,585 |
|                              | <b>BA39</b> - <i>Angular Gyrus</i> (right)                          | 44, -38, 12  | 3,217 |
|                              | <b>BA40</b> - <i>Secondary somatosensory representation</i> (right) | 53, -37, 33  | 3,215 |
|                              | <b>BA41</b> and <b>BA42</b> - <i>A1</i> (right)                     | 32, -23, 15  | 4,106 |
| Manual vs<br>Manual + Verbal | <b>BA5</b> and <b>BA7</b> - <i>S2</i> (right)                       | 26, -47, 42  | 3,396 |
|                              | <b>BA31</b> - <i>Isthmus - Cingulate cortex</i> (right)             | 14, -35, 39  | 3,393 |
| Manual + Verbal vs<br>Manual | <b>BA21</b> - <i>Lateral Temporal lobe</i> (right, left)            | 62, -23, 0   | 4,587 |
|                              |                                                                     | -64, -20, -6 | 3,304 |
|                              | <b>BA22</b> - <i>Wernicke</i> (right, left)                         | 63, -20, 6   | 4,325 |
|                              |                                                                     | -59, -8, 6   | 3,794 |
|                              | <b>BA38</b> - <i>Temporal Pole</i> (left)                           | -58, 7, 0    | 3,142 |
|                              | <b>BA42</b> - <i>A1</i> (right, left)                               | 62, -18, 9   | 4,073 |
|                              |                                                                     | -55, -17, 9  | 5,064 |
